# Supplementary material
Source: Springer Nature journal article supplement (https://www.springermedizin.de/resource/supplementary/12885_2006_624_MOESM4_ESM.pdf/9469934)
Supplement: MOESM4 [file 9469934]

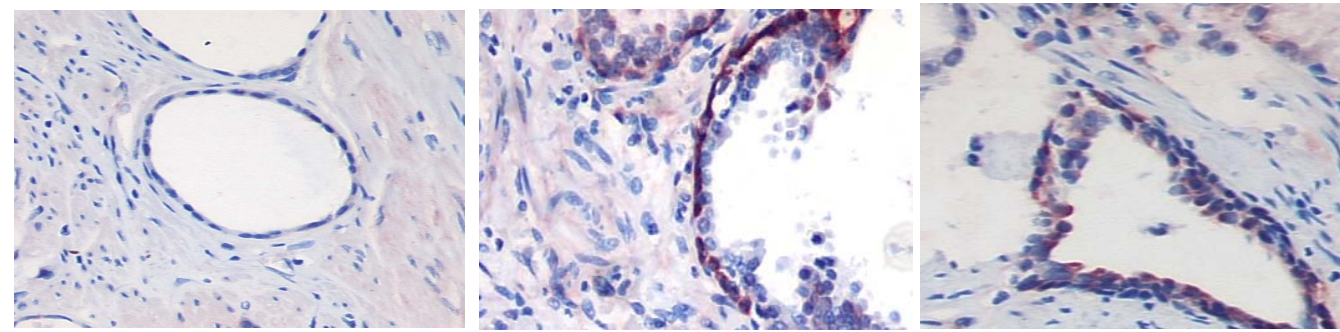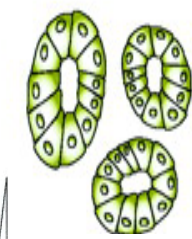

Normal epithelium / BPH

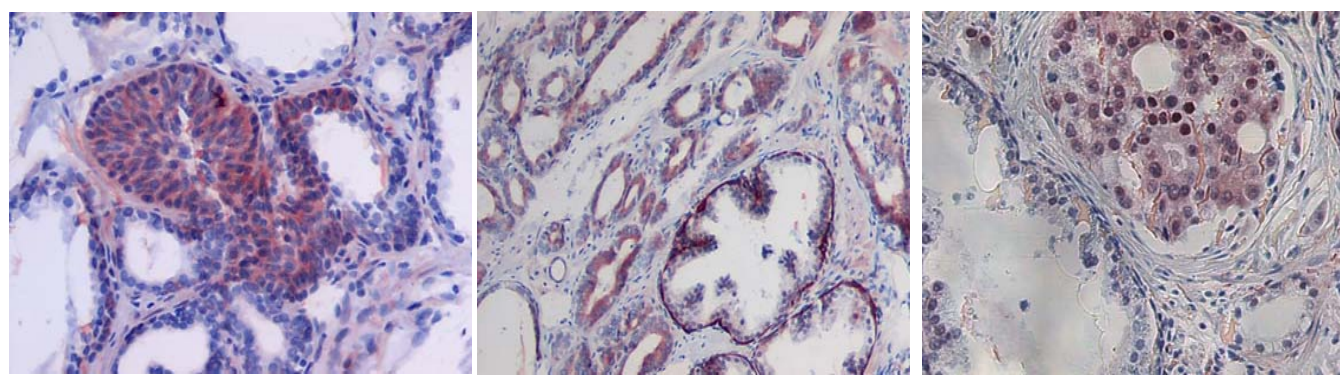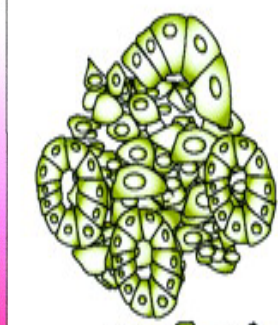

Primary localized clinical cancer

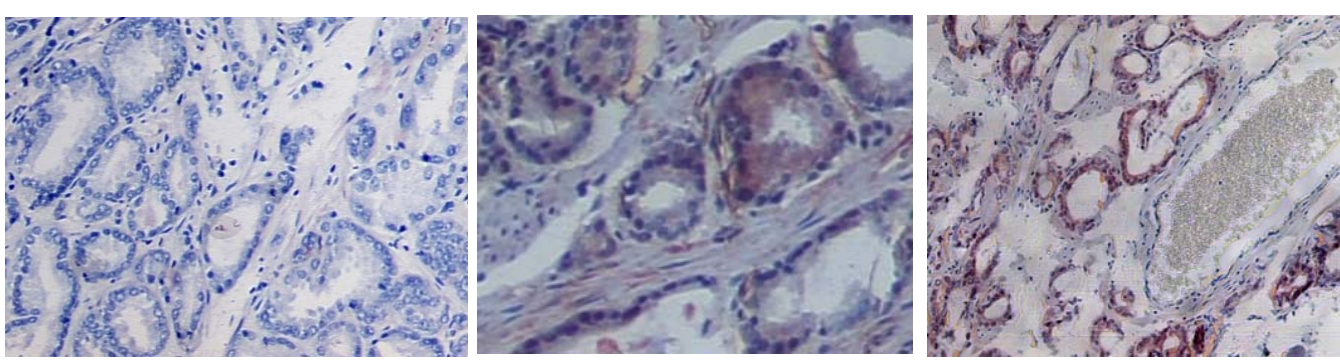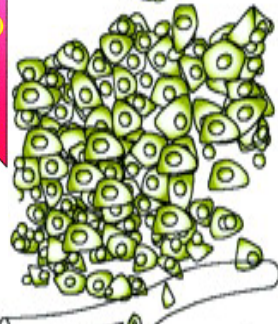

Hormone-refractory cancer

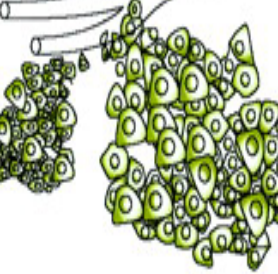

Metastatic cancer

Progression

MART 1

TACC1

WT1

Markers of human prostate cancer progression
